# Supplementary material
Source: publisher figshare collection journal article supplement (https://acs.figshare.com/ndownloader/files/20721294)
Supplement: Supplementary file 1 [file 20721294]

## Supporting Information

### **Nitrogen-Doped Carbon Quantum Dots-Decorated Mg-Al Layered Double Hydroxide Supported Gold Nanocatalysts for Efficient Base-free Oxidation of Benzyl Alcohol**

Yujing Guo<sup>1</sup>, Lipeng Fan<sup>1</sup>, Mengran Liu, Lan Yang\*, Guoli Fan, Feng Li\*

*State Key Laboratory of Chemical Resource Engineering, Beijing Advanced Innovation Center for Soft Matter Science and Engineering, Beijing University of Chemical Technology, No.15, Beisanhuan East Road, 100029, Beijing, China.*

\* To whom correspondence should be addressed.

Tel.: +8610-64451226; fax: +8610-64425385.

E-mail: yanglan@mail.buct.edu.cn (L. Yang); lifeng@mail.buct.edu.cn (F. Li).

<sup>1</sup> Y. Guo and L. Fan contributed equally to this work.

**6 Figures and 1 Table.**

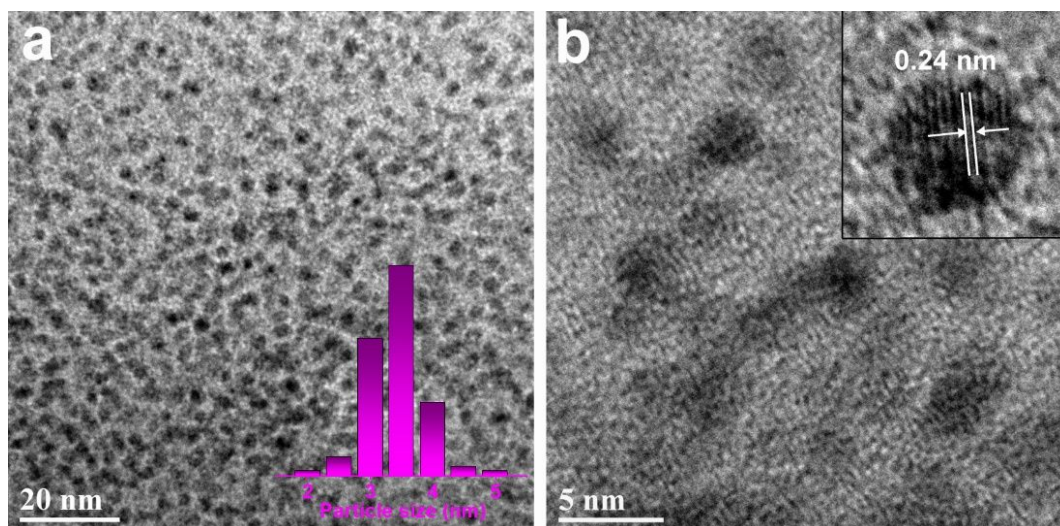

**Figure S1** TEM (a) and HRTEM (b) images of NCDs. Insets in (a) and (b) are the histogram of the size distribution of NCDs and the HRTEM image of a single NCD, respectively.

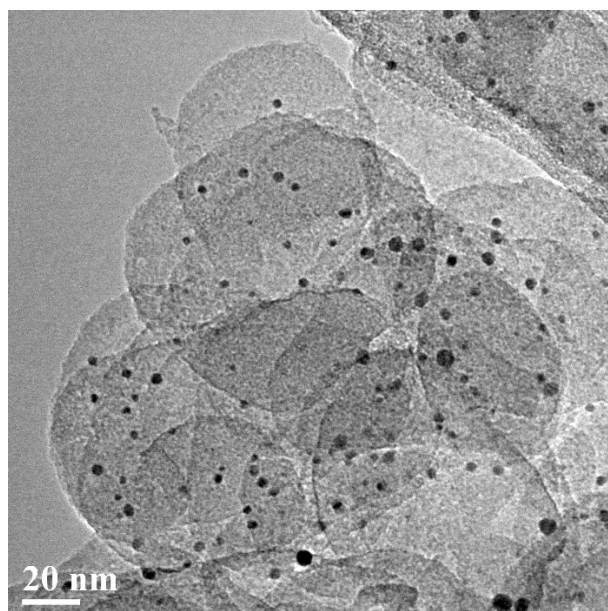

**Figure S2** TEM image of Au/MgAl-LDH sample.

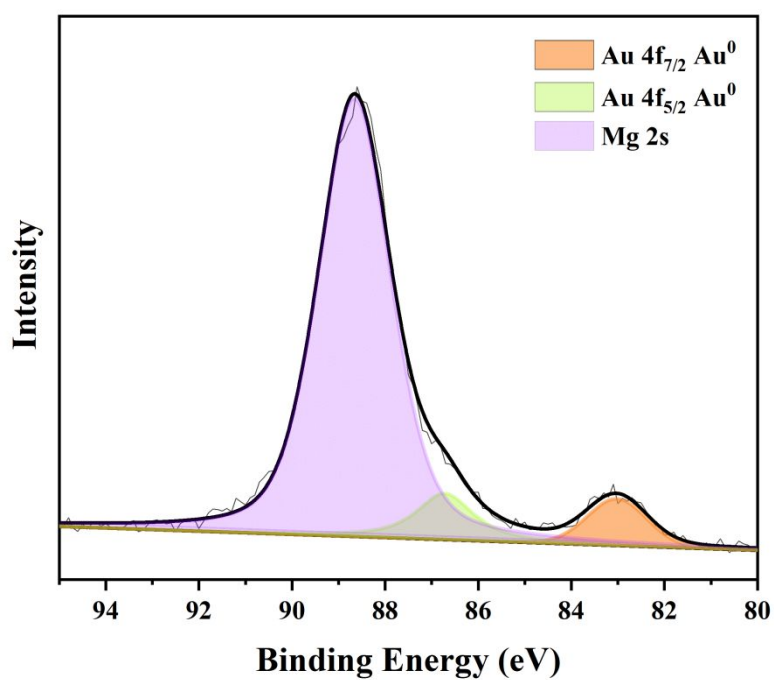

**Figure S3** XPS of Au 4f region of Au/MgAl-LDH sample.

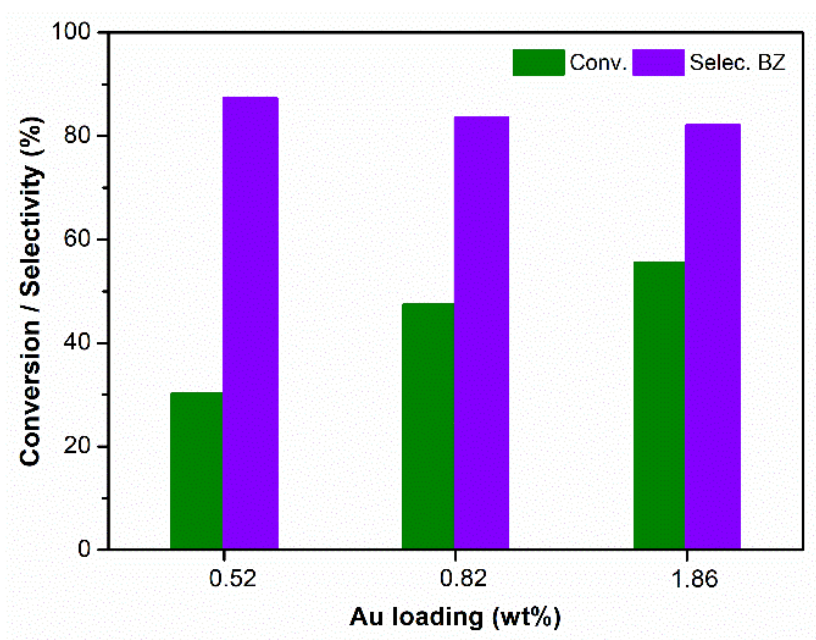

**Figure S4** Effect of the Au loading amount on the BA conversion and BZ selectivity over the Au/NCD/MgAl-LDH. Reaction conditions: reaction temperature, 120 °C; oxygen partial pressure, 0.4 MPa; reaction time, 4h.

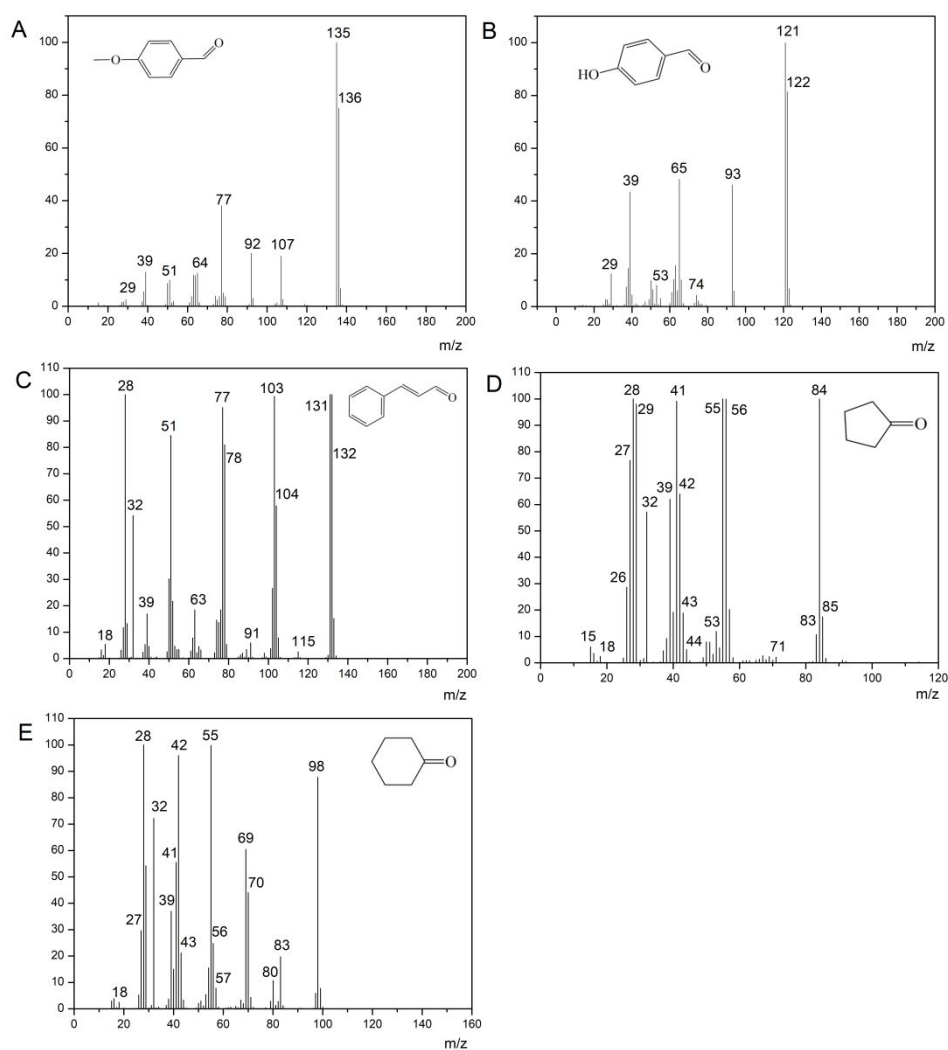

**Figure S5.** GC-MS spectra of main oxidation products obtained in Table 3 from *p*-methoxybenzyl alcohol to *p*-methoxybenzaldehyde (A), from *p*-hydroxybenzyl alcohol to *p*-hydroxybenzaldehyde (B), from cinnamyl alcohol to cinnamic aldehyde (C), from cyclopentanol to cyclopentanone (D), and from cyclohexanol to cyclohexanone (E).

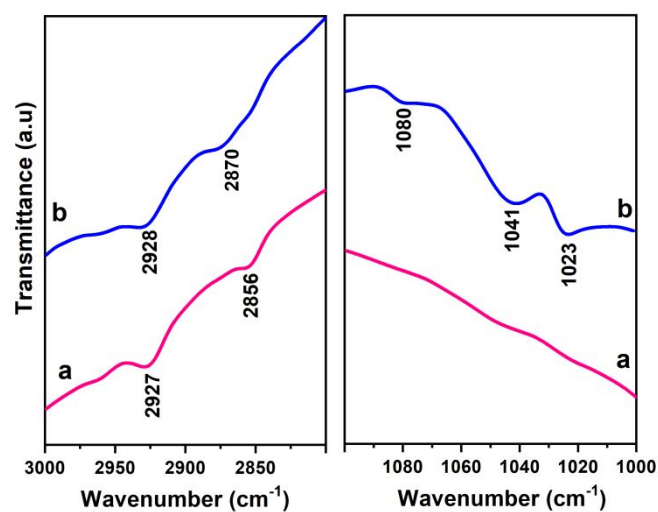

**Figure S6** FT-IR spectra of BA absorption on Au/MgAl-LDH (a) and Au/NCD/MgAl-LDH (b).

**Table S1** Catalytic performance for the oxidation of BA over different catalysts <sup>a</sup>

| Catalyst                                       | Au<br>(wt%) | Temp.<br>(°C) | Solvent | Substrate<br>(mmol) | Time<br>(h) | Conv.<br>(%) | Select. BZ<br>(%) | TOF<br>(h <sup>-1</sup> ) | Refs      |
|------------------------------------------------|-------------|---------------|---------|---------------------|-------------|--------------|-------------------|---------------------------|-----------|
| Au/ZMA-15                                      | 0.81        | 120           | no      | 89.00               | 4           | 40.2         | 99.10             | 5382                      | [61]      |
| Au/CeSnO <sup>b</sup>                          | 1.21        | 100           | toluene | 4.0                 | 3           | 42.3         | >99               | 316.8                     | [62]      |
| Au/Al <sub>2</sub> O <sub>3</sub> <sup>b</sup> | 0.27        | 50            | toluene | 53.35               | 3           | 33           | 100               | 5860                      | [63]      |
| Au/CeO <sub>2</sub> <sup>c</sup>               | 1.0         | 120           | no      | 18.50               | 4           | 3.7          | 94.0              | N.A.                      | [64]      |
| Au/TiO <sub>2</sub> <sup>d</sup>               | 1.0         | 160           | no      | 355.7               | 6           | 55           | 73.7              | 6348                      | [65]      |
| Au/C <sup>e</sup>                              | 1.0         | 120           | no      | 355.7               | 6           | 6.6          | 63.9              | 1676                      | [66]      |
| Au/MgAl-LDH                                    | 0.91        | 120           | no      | 89.00               | 4           | 38.2         | 84.5              | 8591                      | This work |
| Au/NCD/MgAl-LDH                                | 0.82        | 120           | no      | 89.00               | 4           | 47.3         | 85.5              | 20175                     | This work |

<sup>a</sup> Catalyst = 100 mg, oxygen pressure = 0.4 MPa; <sup>b</sup> Solvent=4 mL, catalyst =100 mg; <sup>c</sup> Catalyst = 0.05 g; <sup>d</sup> Catalyst = 0.1 g; <sup>e</sup> BA/metal molar ratio = 250:1.
